# Supplementary material for: The accessory protein TagV is required for full Type VI secretion system activity in Serratia marcescens
Source: PubMed Central journal article supplement (PMC7614798; doi:10.1111/mmi.15027), 2023-01-23
Supplement: EMS180548-supplement-Supplementary_Data.pdf [file EMS180548-supplement-Supplementary_Data.pdf]

## Supplementary Information

### The accessory protein TagV is required for full Type VI secretion system activity in *Serratia marcescens*

Mark Reglinski<sup>1†</sup>, Laura Monlezun<sup>1,2†</sup> and Sarah J. Coulthurst<sup>1\*</sup>

<sup>1</sup> Division of Molecular Microbiology, School of Life Sciences, University of Dundee, Dundee, United Kingdom DD1 5EH.

<sup>2</sup> Current address: Université Paris Cité, CNRS, Expression Génétique Microbienne, Institut de Biologie Physico-Chimique, Paris, France.

† These authors contributed equally

\* For correspondence: Sarah J. Coulthurst ([s.j.coulthurst@dundee.ac.uk](mailto:s.j.coulthurst@dundee.ac.uk))

#### List of contents

**Figure S1.** Multiple sequence alignment of TagV and its homologues.

**Figure S2.** The reduced Hcp secretion observed in the  $\Delta tagV$  and  $\Delta tssJ$  mutants can be complemented by expression of the respective gene *in trans*.

**Figure S3.** The outer membrane lipoproteins TagV and TssJ solubilise with the inner membrane of *S. marcescens* in selective detergent solubilisation experiments.

**Figure S4.** Genetic manipulation of *tagV* results in decreased TssJ production which cannot be restored by complementation with *tagV*.

**Figure S5.** Expression of *tagV* but not *tssJ* *in trans* is able to restore T6SS activity in the *tagV* <sub>$\Delta$ 3-151</sub> mutant.

**Figure S6.** TssK production in strains carrying two different deletions in *tssJ*.

**Figure S7.** Integrity of proteins used for *in vitro* complex formation experiments.

**Figure S8.** TssJ does not co-purify with TagV-His when both are expressed from a plasmid.

**Figure S9.** The predicted surface topology of the putative TagV SH3b domain.

**Figure S10.** Superimposition of the putative TagV SH3b domain and Psm.

**Table S1.** Previously-described Type VI associated genes (Tags).

**Table S2.** Strains and plasmids used in this study.

**Table S3.** Primers used in this study.

**References** for Supplementary Information

```

TagV          -----MKTRITLTLTALTLAGCSTPPPPPALNNDALISSEVNGVTLQH      45
PAGR_g2450   -----MKKNLAFILLAGLLLSGCKTTP---PAVNDDTLVTSVNGVKLVH      42
Ebc_18420    -----MKCMRTNVKISIAFTLLAVLSLSGCKAPP---PPITDDTIVTSEVDGVKFTH      49
PAGR_g1655   -----MELNMKKMNVNFRIALSLMFVFAVAGCKTP----PKMTDDTMVSSTVDGTTLIH      49
ES15_3853    -----MNMRIVLALLFVLGVAGCKAPP---PAVTDDTIVTSVNGVTLTH      42
EAM_0571     -----MVKIRIALSLLLVMVSVGCKTTP---PQITDDTVVSSTVDGVKLSY      43
Ebc_05760    MSYAFHSSKKNFMRIMVKIRIALSLLFVLTVAGCKAPP---PAMTDDTIISSSTVDGVKLT      57
              ::  ::  *:  :  :  **:.*  *  :.:*:::*  *:*..:  :

TagV          RAAVSAPKQFKPIGEEYRSLYAASIMSSPNYTGTAVGSLDNAAAFYALGEVENNWLAI      105
PAGR_g2450   RHAVAAPTTFFTPINQTRALYKASVMTQPDYGGKVVRYLEAGKSFVGLSVENHWLAIAD      102
Ebc_18420    RHAVQAPTSFSTPVNETYRALYNASVMTSPDFSGKNVRYLENGKPFVTLGEVENHWLAIAD      109
PAGR_g1655   RHAVAAPAQFSALNESYRALYPASVMTRPDFGGKVVETLKTGETYTVVGVQVENNWLALGE      109
ES15_3853    RHAVTPPKFEPVNEEYRAMYPASVMTRPDFGGKVVVRQLETGKTYNVLGQVEGHWLAIAD      102
EAM_0571     RHAITPPQSFTPVNEEYRALYAASVMSRPDFGGKLVRLDNGQTFVTLGSVENNWFIAID      103
Ebc_05760    RHAVQPPTSFTPVNEEYRALYDASVMNRPDFGGKLVSNLENGKPYTVLGSVENNWFIAIE      117
              * *:  * *  :.: :*:.* **:*. *:  * *  * .  :  :.*.*.:*:*..

TagV          IRG-----GDLMGYIQANAGVPEARYKSTLRKDLPRRAR      139
PAGR_g2450   KPD-----GMLTGYVPLKAGVERHRYDDTLRNDRPRPRK      136
Ebc_18420    PDQ-----EQLIGYVFPKAGVKTDLYDATIKSDRPRPRK      143
PAGR_g1655   EAQAEAPPAASDAKATDSKAAPAQATTSAIKVVGVVFPFRAVVKSDLYDQTVKADQPKRRA      169
ES15_3853    QGE-----EQLIGYVPLRAAVKSSLYDATVSKEIPK--L      134
EAM_0571     AGQ-----EQLIGYVPLRAGVKSDLYNQTLKADQRRKR      137
Ebc_05760    QGQ-----EQLIGYVPLRAVVKSDLYDKTVKADSRKR      151
              : **:  .* *  * . *:  :  :

TagV          ---AAKQDCVKVGGDSKACKNAGSATWILQ 166
PAGR_g2450   ---T-KQVCVDVGGDSKACRNTATATWILN 162
Ebc_18420    ---NAKKVCVDVGGQSKACRNNATATWILE 170
PAGR_g1655   RAAAKKKKTCVSDGNSQACQNKNGTWIIN 199
ES15_3853    RRKTAKANCVTVDGNSKACKNTKSGTWIID 164
EAM_0571     RAPAkkkTCVAVDGDSKACQNNNGTWIID 167
Ebc_05760    RAASK-KTCV-AAGDSKACQNSNSGTWIID 179
              ** . *:*:*:* * ..*:*:

```

**Figure S1. Multiple sequence alignment of TagV and its homologues.** Sequence titles for TagV homologues refer to their genomic identifiers as presented in Figure 1.

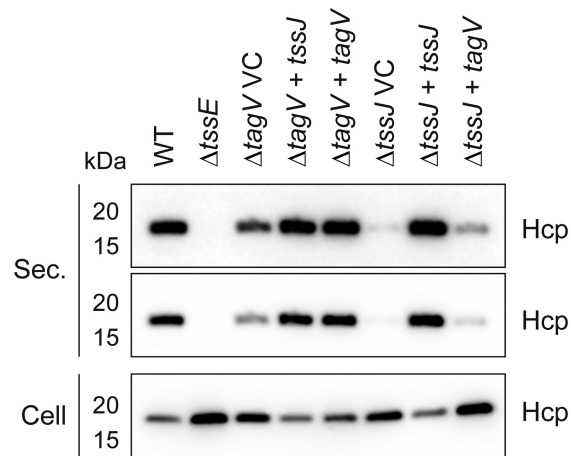

**Figure S2. The reduced Hcp secretion observed in the  $\Delta tagV$  and  $\Delta tssJ$  mutants can be complemented by expression of the respective gene *in trans*.** Levels of Hcp in the total cellular (Cell) and secreted (Sec.) protein fractions from wild type (WT) and mutant strains of *S. marcescens* carrying the vector control plasmid (pSUPROM, VC) or plasmids directing the expression of *tagV* (+ *tagV*) or *tssJ* (+ *tssJ*) as detected by immunoblot. Two different images of the same blot are shown for the secreted fractions to aid clarity of all bands.

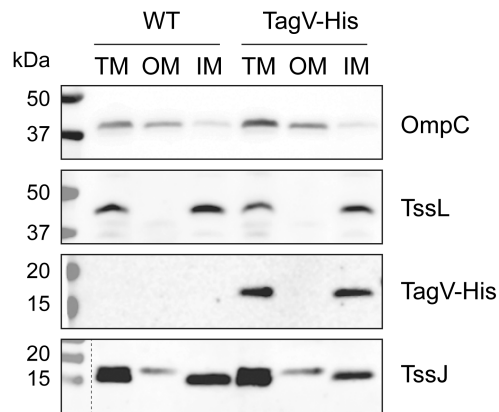

**Figure S3. The outer membrane lipoproteins TagV and TssJ solubilise with the inner membrane of *S. marcescens* in selective detergent solubilisation experiments.** Total membrane fractions (TM) of wild type (WT) and TagV-His were separated into outer membrane (OM) and inner membrane (IM) fractions by selective detergent (sarkosyl) solubilisation. Fractionated membranes were probed for the presence of OmpC (outer membrane control), TssL (inner membrane control), TagV-His or TssJ by immunoblot.

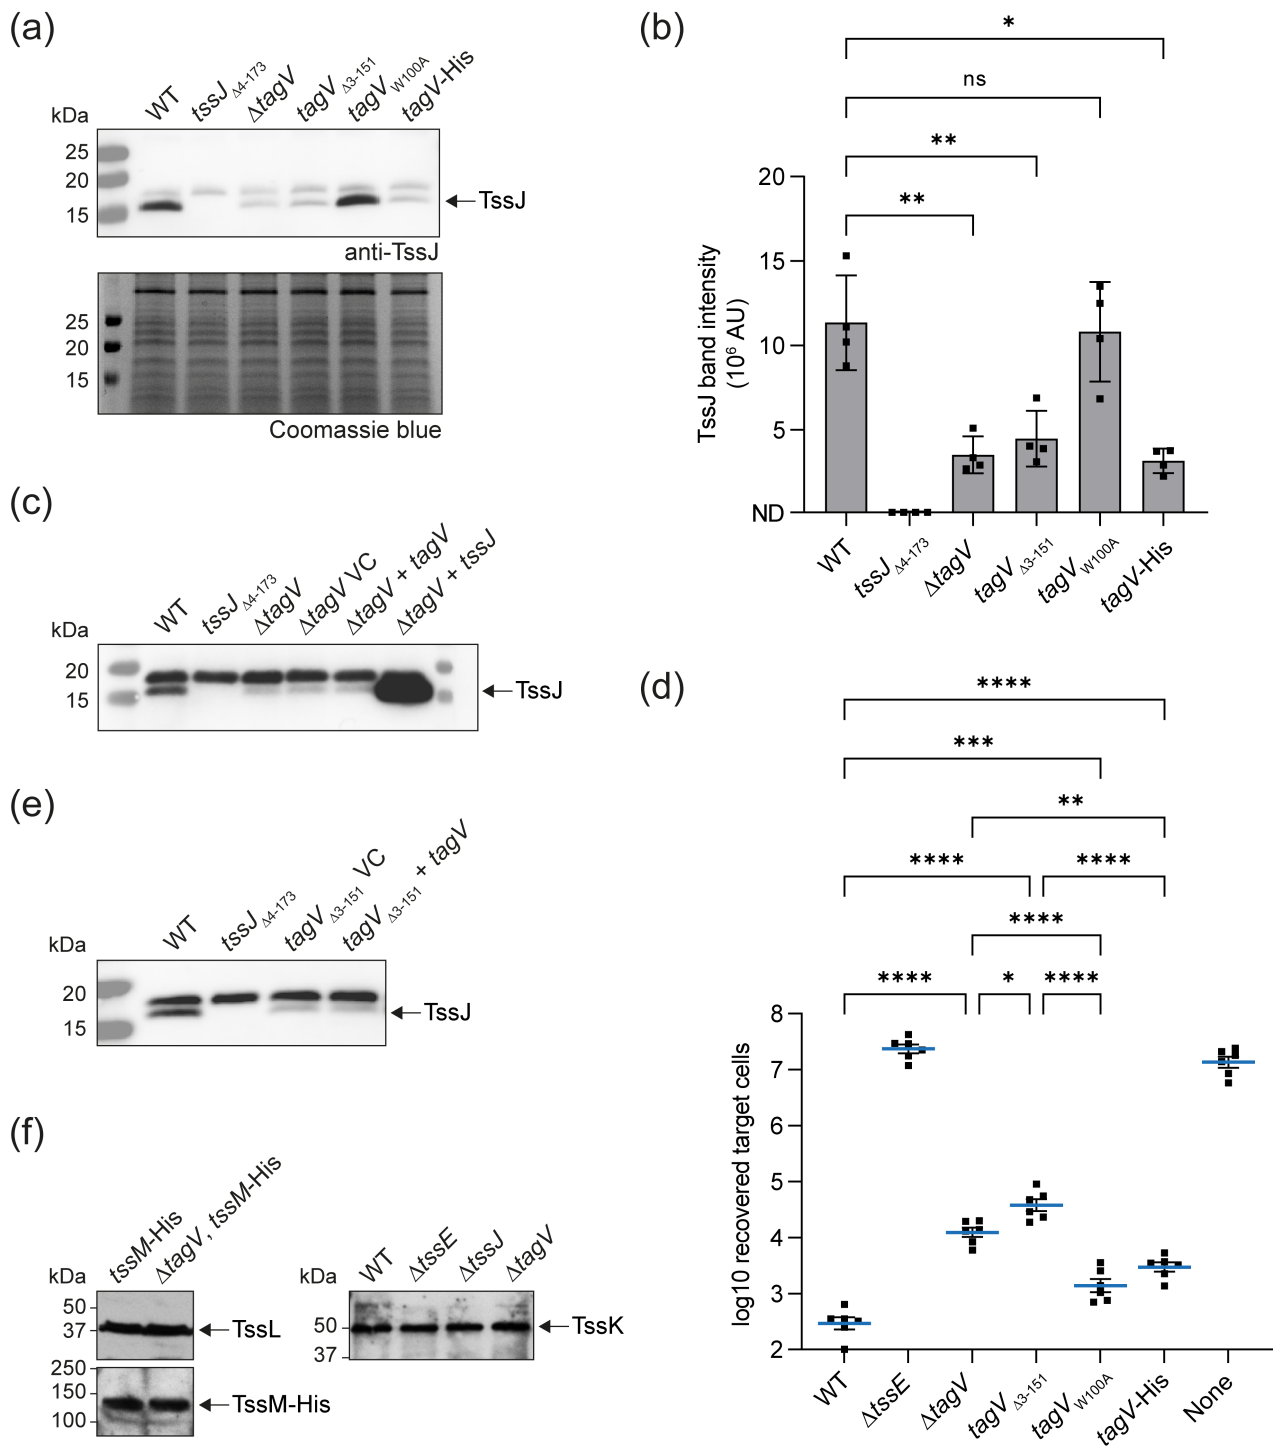

**Figure S4. Genetic manipulation of *tagV* results in decreased TssJ production which cannot be restored by complementation with *tagV*.** (a) Total cellular protein samples from wild type (WT) and mutant strains of *S. marcescens* were analysed for TssJ production by immunoblot. (b) TssJ band intensity as measured by densitometry. Data are displayed as mean  $\pm$  SEM from four independent experiments with individual data points overlaid. One-way ANOVA with Dunnett's multiple comparison test was performed (\*\*  $P < 0.01$ ; \*  $P < 0.05$ ; ns, not significant). (c) As in panel a except the  $\Delta$ *tagV* mutant is carrying either the vector control plasmid (pSUPROM, VC) or plasmids directing the expression of *tagV* (+ *tagV*) or *tssJ* (+ *tssJ*) in trans. (d) Recovery of *P. fluorescens* KT02 target cells following co-culture with WT and mutant strains of *S. marcescens* at an initial ratio of 1:1 for four

hours. Data are displayed as mean  $\pm$  SEM (n=6) with individual data points overlaid. One-way ANOVA with Tukey's multiple comparison test was performed (\*\*\*\*  $P < 0.0001$ ; \*\*\*  $P < 0.001$ ; \*\*  $P < 0.01$ ; \*  $P < 0.05$ ; for clarity, only selected comparisons are displayed). None, sterile media only. (e) As in panel c except the *tagV* $_{\Delta 3-151}$  mutant is carrying either the vector control plasmid (pSUPROM, VC) or plasmids directing the expression of *tagV* (+ *tagV*) *in trans*. (f) Total cellular protein samples from WT and mutant strains of *S. marcescens* were analysed for TssL, TssM and TssK production by immunoblot (TssM levels were detected by anti-His immunoblot of strains encoding TssM-His<sub>6</sub> at the normal chromosomal location, *tssM*-His).

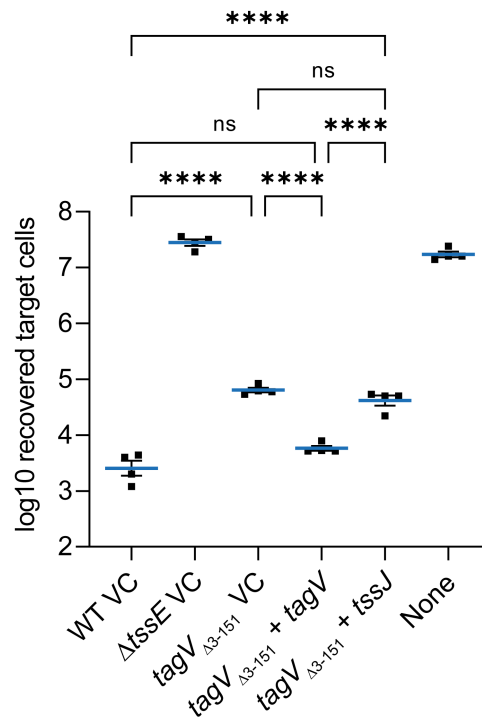

**Figure S5. Expression of *tagV* but not *tssJ* *in trans* is able to restore T6SS activity in the *tagV* <sub>$\Delta$ 3-151</sub> mutant.** Recovery of *P. fluorescens* KT04 following co-culture with WT and mutant strains of *S. marcescens* carrying either the vector control plasmid (pSUPROM, VC) or plasmids directing the expression of *tagV* (+ *tagV*) or *tssJ* (+ *tssJ*) *in trans*. Data are displayed as mean +/- SEM (n=4) with individual data points overlaid. One-way ANOVA with Tukey's multiple comparison test was performed (\*\*\*\*  $P < 0.0001$ ; ns, not significant; for clarity, only selected comparisons are displayed). None, sterile media only.

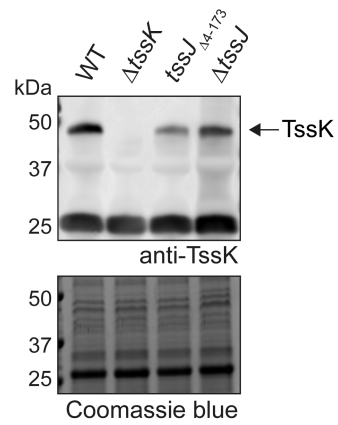

**Figure S6. TssK production in strains carrying two different deletions in *tssJ*.** Levels of TssK in total membrane protein fractions from wild type (WT) and mutant strains of *S. marcescens* were determined by immunoblot ( $tssJ_{\Delta 4-173}$ , in-frame deletion of amino acids 4-173 of 176;  $\Delta tssJ$ , in-frame deletion of amino acids 4-28).



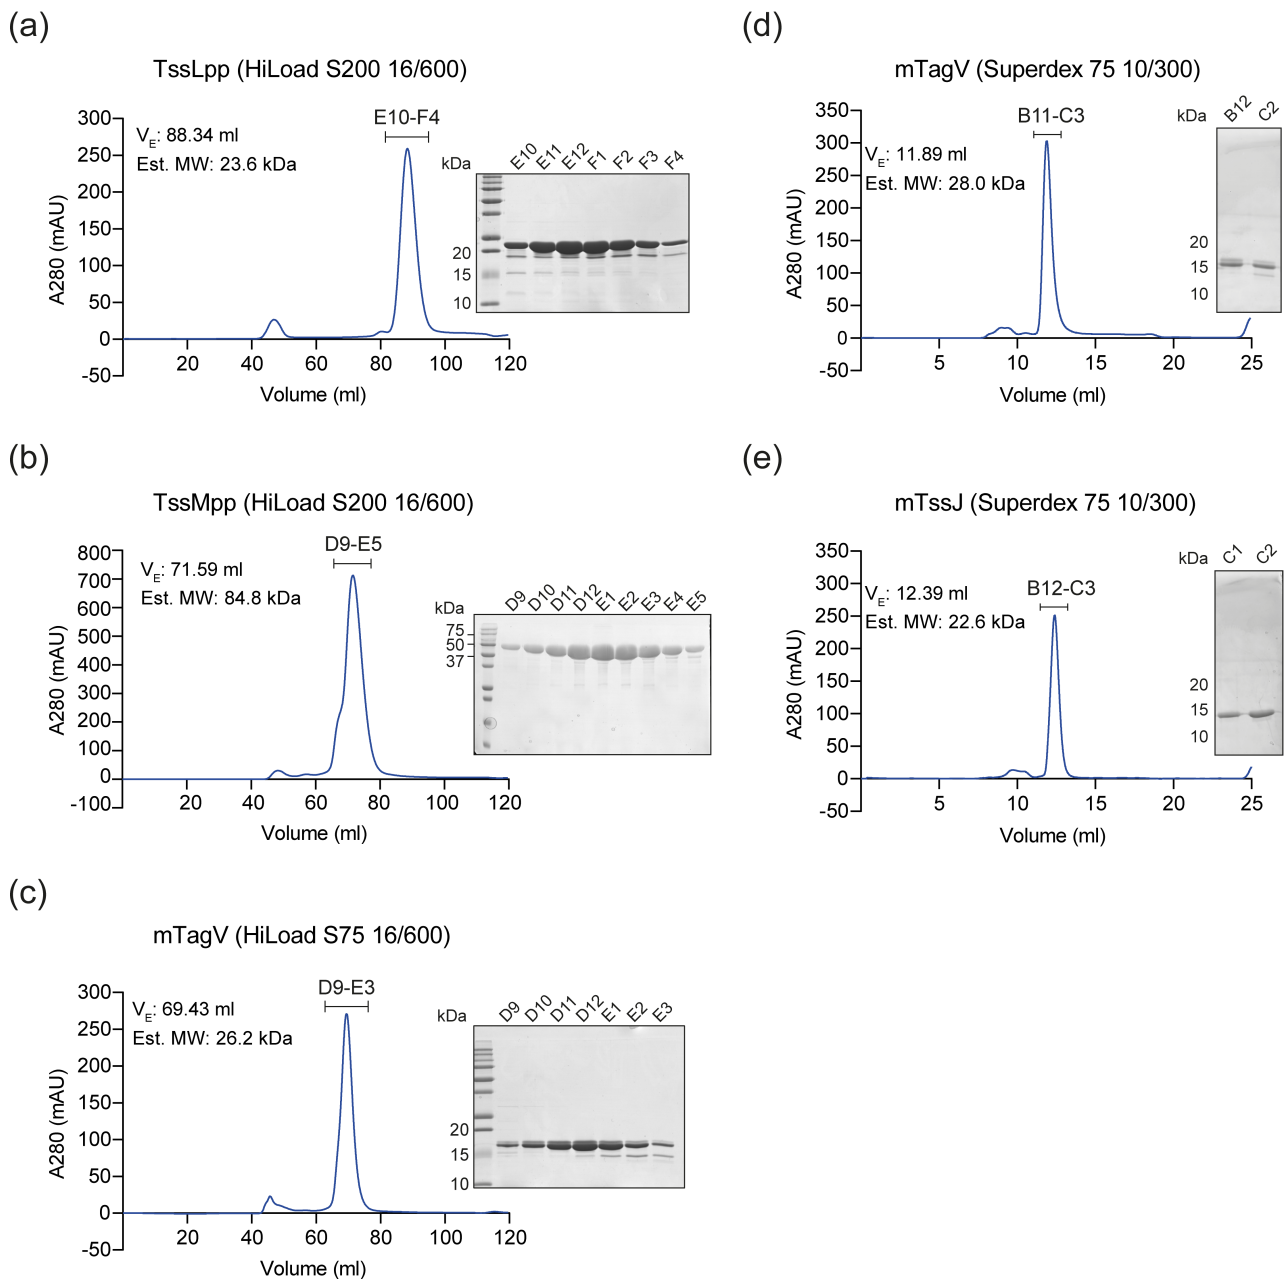

**Figure S7. Integrity of proteins used for *in vitro* complex formation experiments.** Affinity purified periplasmic domains of TssL (TssLpp, panel a) and TssM (TssMpp, panel b), and mature TagV (mTagV, panels c and d) and TssJ (mTssJ, panel e) proteins were separated by size exclusion chromatography using the column indicated. Protein fractions were visualised by SDS-PAGE and Coomassie staining. The elution volume ( $V_E$ ) and estimated molecular weight (Est. Mw) of each peak, based on calibration of the column with protein standards, is noted in each case. Note that the data in panels d and e is the same as that used in Figure 4c for the individual mTagV and mTssJ proteins.

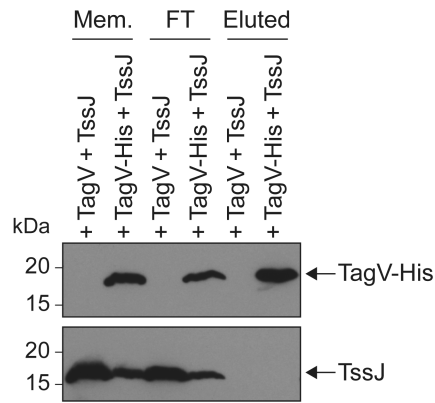

**Figure S8. TssJ does not co-purify with TagV-His when both are expressed from a plasmid.** Total membrane fractions prepared from *S. marcescens* Db10  $\Delta tagV \Delta tssJ$  carrying plasmids directing the expression of TagV and TssJ (pSC2017) or TagV-His and TssJ (pSC2040) were incubated with  $Ni^{2+}$  beads and the membrane (input, Mem.), flowthrough (FT) and eluted fractions were probed for the presence of TagV-His and TssJ by immunoblot.

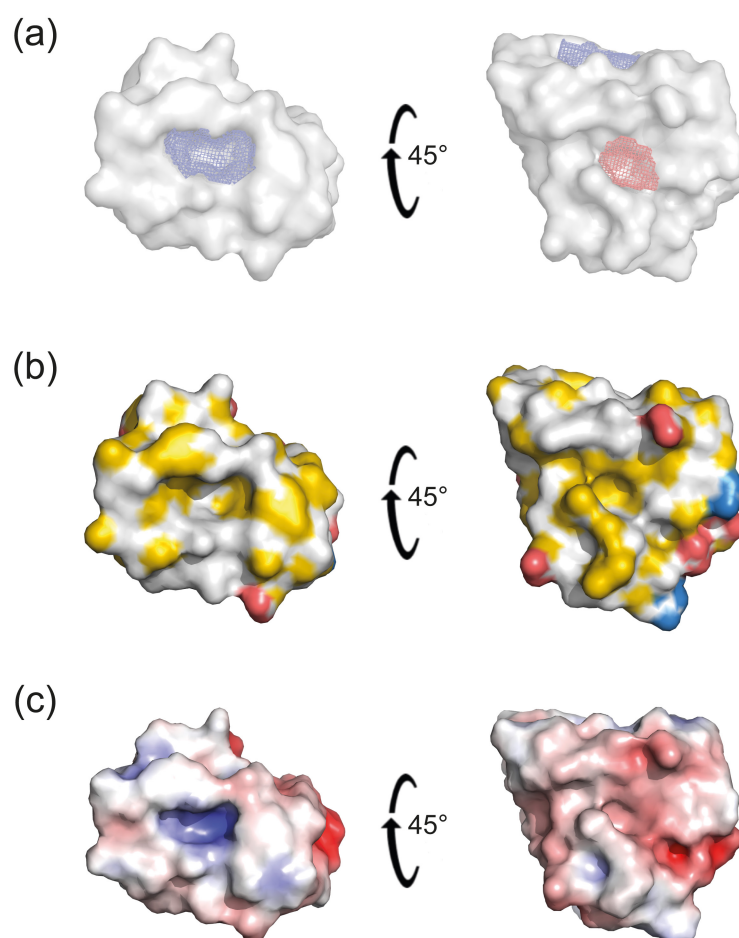

**Figure S9. The predicted surface topology of the putative TagV SH3b domain.** (a) Pockets P0 (blue mesh) and P1 (red mesh) identified by the DogSiteScorer algorithm (Volkamer *et al.*, 2012). (b) Surface hydrophobicity as determined using the YRB scheme proposed by Hagemans and colleagues (Hagemans *et al.*, 2015). Hydrophobic regions are highlighted in yellow, negatively charged groups of glutamate and aspartate are highlighted in red and positively charged functional groups of lysine and arginine are highlighted in blue. (c) Electrostatic potential as determined using the Adaptive Poisson-Boltzmann Solver for PyMol 2.0 (Baker *et al.*, 2001) and scaled from +5 kT/e (positive, blue) to -5 kT/e (negative, red).

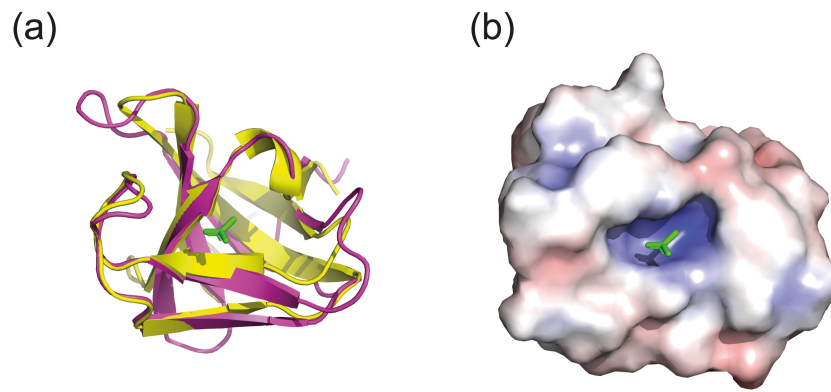

**Figure S10. Superimposition of the putative TagV SH3b domain and Psm.** (a) The putative TagV SH3b domain (yellow ribbon) is superimposed onto the structure of Psm (PDB 4krt, purple ribbon) in complex with an acetic acid molecule (green stick) with an RMSD of 0.719 Å. (b) The surface electrostatic potential of the superimposed TagV SH3b domain was determined using the Adaptive Poisson-Boltzmann Solver for PyMol 2.0 (Baker *et al.*, 2001) and is scaled from +5 kT/e (positive, blue) to -5 kT/e (negative, red).

**Table S1. Previously-described Type VI associated genes (Tags).**

| <b>Name</b>  | <b>Description</b>                                                                                                                                                                                                                    | <b>Reference</b>                                                                           |
|--------------|---------------------------------------------------------------------------------------------------------------------------------------------------------------------------------------------------------------------------------------|--------------------------------------------------------------------------------------------|
| TagA         | DUF2169 domain-containing protein often encoded in T6SS gene clusters and originally named by Shalom and colleagues. Subsequently proposed to be an adaptor/chaperone protein for PAAR-containing effectors.                          | (Shalom <i>et al.</i> , 2007, Bondage <i>et al.</i> , 2016)                                |
| TagA / TsmA  | ImpA_N domain-containing protein. Terminates sheath polymerisation and maintains 'long' TssA (TssA <sub>L</sub> or TsaC) in extended conformation.                                                                                    | (Santin <i>et al.</i> , 2018, Schneider <i>et al.</i> , 2019)                              |
| TagB         | Pentapeptide repeat protein often encoded in T6SS gene clusters and originally named by Shalom and colleagues. Function unknown.                                                                                                      | (Shalom <i>et al.</i> , 2007)                                                              |
| TagB / TsmB* | Sheath stabilisation in some T6SSs containing 'short' TssA (TssA <sub>S</sub> or TsaB). Also known as TagB1 and previously as TagX1. We propose it be named TsmB to fit with the nomenclature of Schneider <i>et al.</i> <sup>7</sup> | (Bernal <i>et al.</i> , 2021)                                                              |
| TagC         | Protein of unknown function often encoded in T6SS gene clusters.                                                                                                                                                                      | (Lennings <i>et al.</i> , 2018, Shalom <i>et al.</i> , 2007)                               |
| TagD         | Class of PAAR protein, containing DUF4150 domain. Part of "PAAR_E" phylogenetic clade defined by Zhang and colleagues.                                                                                                                | (Lennings <i>et al.</i> , 2018, Zhang <i>et al.</i> , 2021)                                |
| TagE         | Usually known as PpkA. Thr protein kinase that phosphorylates Fha or TssL, activating T6SS assembly.                                                                                                                                  | (Jiang <i>et al.</i> , 2019, Lin <i>et al.</i> , 2014, Fritsch <i>et al.</i> , 2013)       |
| TagF         | Negative post-translational regulator of T6SS assembly.                                                                                                                                                                               | (Lin <i>et al.</i> , 2018, Silverman <i>et al.</i> , 2011)                                 |
| TagG         | Usually known as PppA. Thr protein phosphatase that dephosphorylates Fha, repressing T6SS assembly.                                                                                                                                   | (Mougous <i>et al.</i> , 2007, Jiang <i>et al.</i> , 2019, Fritsch <i>et al.</i> , 2013)   |
| TagH         | Usually known as Fha. FHA domain-containing protein required for T6SS assembly in many T6SS. Can be substrate for PpkA phosphorylation.                                                                                               | (Mougous <i>et al.</i> , 2007, Jiang <i>et al.</i> , 2019, Ostrowski <i>et al.</i> , 2018) |
| TagI         | Putative peptidoglycan-binding lipoprotein, function unknown.                                                                                                                                                                         | (Shalom <i>et al.</i> , 2007)                                                              |
| TagJ         | Sheath stabilisation in some T6SSs containing 'short' TssA (also known as TssA <sub>S</sub> or TsaB).                                                                                                                                 | (Bernal <i>et al.</i> , 2021, Forster <i>et al.</i> , 2014)                                |
| TagK         | Function unknown.                                                                                                                                                                                                                     | (Shalom <i>et al.</i> , 2007)                                                              |
| TagL         | Also known as SciZ. Peptidoglycan-binding inner membrane protein, anchors membrane complex to the cell wall in T6SSs with 'short' TssL.                                                                                               | (Santin <i>et al.</i> , 2019, Nguyen <i>et al.</i> , 2021)                                 |
| TagM         | Putative outer membrane lipoprotein with peptidoglycan-binding domain, function unknown.                                                                                                                                              | (Spiewak <i>et al.</i> , 2019, Shalom <i>et al.</i> , 2007)                                |
| TagN         | Putative peptidoglycan-binding protein, function unknown.                                                                                                                                                                             | (Aschtgen <i>et al.</i> , 2010, Ringel <i>et al.</i> , 2017)                               |
| TagO         | Also known as VasI, function unknown.                                                                                                                                                                                                 | (Zhang <i>et al.</i> , 2020, Moriel <i>et al.</i> , 2021)                                  |
| TagP         | Putative peptidoglycan-binding homologue of TssM. Thought to bind TssL.                                                                                                                                                               | (Aschtgen <i>et al.</i> , 2010)                                                            |
| TagQ         | Anchors TagR to the outer membrane.                                                                                                                                                                                                   | (Casabona <i>et al.</i> , 2013)                                                            |
| TagR         | Positive regulator of PpkA kinase activity and thus Fha phosphorylation.                                                                                                                                                              | (Hsu <i>et al.</i> , 2009, Casabona <i>et al.</i> , 2013)                                  |
| TagS         | Integral membrane protein forming a membrane associated complex with TagT which co-operates with TagQR to regulate Fha phosphorylation by PpkA. TagQRST detects incoming T6SS attacks.                                                | (Casabona <i>et al.</i> , 2013, Basler <i>et al.</i> , 2013)                               |

|      |                                                                                                                                                                     |                                                                                                              |
|------|---------------------------------------------------------------------------------------------------------------------------------------------------------------------|--------------------------------------------------------------------------------------------------------------|
| TagT | ATPase forming a membrane associated complex with TagS which co-operates with TagQR to regulate Fha phosphorylation by PpkA. TagQRST detects incoming T6SS attacks. | (Casabona <i>et al.</i> , 2013, Basler <i>et al.</i> , 2013)                                                 |
| TagU | Unknown, variably described as a lipoprotein in <i>P. fluorescens</i> Pf29Arp and <i>P. chlororaphis</i> O6 and as a truncated ORF in <i>P. fluorescens</i> MFE01.  | (Marchi <i>et al.</i> , 2013, Gallique <i>et al.</i> , 2017)                                                 |
| TagV | Not defined to date.                                                                                                                                                |                                                                                                              |
| TagW | Putative peptidoglycan binding protein, function unknown.                                                                                                           | (Aschtgen <i>et al.</i> , 2010)                                                                              |
| TagX | Also known as AsaE, peptidoglycan hydrolase required for T6SS transport across cell wall.                                                                           | (Weber <i>et al.</i> , 2016, Spiewak <i>et al.</i> , 2019)                                                   |
| TagY | Transmembrane domain containing protein, function unknown.                                                                                                          | (Spiewak <i>et al.</i> , 2019)                                                                               |
| TagZ | Also known as AsaB, putative cytoplasmic membrane protein, function unknown.                                                                                        | (Spiewak <i>et al.</i> , 2019)                                                                               |
| AsaA | Also known as TslA. Interacts with TssM and directs T6SS assembly to cell-cell contact sites.                                                                       | (Li <i>et al.</i> , 2019, Ringel <i>et al.</i> , 2017, Weber <i>et al.</i> , 2016, Lin <i>et al.</i> , 2022) |
| RtkS | Interacts with PpkA and regulates T6SS firing.                                                                                                                      | (Ostrowski <i>et al.</i> , 2018)                                                                             |
| TasL | Mediates cell-cell attachment which facilitates T6SS intoxication.                                                                                                  | (Speare <i>et al.</i> , 2022)                                                                                |

\*Name proposed here

**Table S2. Strains and plasmids used in this study.**

| Name                                  | Details                                                                                                                                                 | Reference                      |
|---------------------------------------|---------------------------------------------------------------------------------------------------------------------------------------------------------|--------------------------------|
| <b><u>Bacterial strains</u></b>       |                                                                                                                                                         |                                |
| <b><i>Serratia marcescens</i></b>     |                                                                                                                                                         |                                |
| Db10                                  | Wild type strain                                                                                                                                        | (Flyg <i>et al.</i> , 1980)    |
| SJC11                                 | Db10 $\Delta tssE$ ( <i>SMDB11_2271</i> )                                                                                                               | (Murdoch <i>et al.</i> , 2011) |
| LM04                                  | Db10 $\Delta tagV$ ; in-frame deletion in <i>tagV</i> ( <i>SMDB11_2251</i> ) $\Delta T3$ -T162                                                          | This study                     |
| LM31                                  | Db10 $\Delta tssJ$ ; in-frame deletion in <i>tssJ</i> ( <i>SMDB11_2252</i> ) $\Delta T4$ -S28                                                           | This study                     |
| LM40                                  | Db10 $\Delta tagV \Delta tssJ$ ; in-frame deletions <i>tagV</i> $\Delta T3$ -T162, <i>tssJ</i> $\Delta T4$ -S28                                         | This study                     |
| LM37                                  | Db10 $\Delta tssE \Delta tssJ$ ; in-frame deletions $\Delta tssE$ , <i>tssJ</i> $\Delta T4$ -S28                                                        | This study                     |
| LM70                                  | Db10 <i>tagV</i> $_{\Delta 3-151}$ ; in-frame deletion in <i>tagV</i> $\Delta T3$ -D151                                                                 | This study                     |
| SJC10                                 | Db10 <i>tssJ</i> $_{\Delta 4-173}$ ; in-frame deletion in <i>tssJ</i> $\Delta T4$ -K173                                                                 | (Murdoch <i>et al.</i> , 2011) |
| BH03                                  | Db10 <i>tagV</i> -His; encodes C-terminally His <sub>6</sub> -tagged version of TagV at the native chromosomal location                                 | (Mariano <i>et al.</i> , 2018) |
| MR10                                  | Db10 <i>tagV</i> $_{W100A}$                                                                                                                             | This study                     |
| GM80                                  | Db10 <i>tssM</i> -His; encodes C-terminally His <sub>6</sub> -tagged version of TssM ( <i>SMDB11_2255</i> ) at the native chromosomal location          | (Mariano <i>et al.</i> , 2018) |
| LM45                                  | Db10 $\Delta tagV$ , <i>tssM</i> -His                                                                                                                   | This study                     |
| GE04                                  | Db10 $\Delta tssK$ ( <i>SMDB11_2253</i> )                                                                                                               | (English <i>et al.</i> , 2014) |
| <b><i>Pseudomonas fluorescens</i></b> |                                                                                                                                                         |                                |
| KT02                                  | Sm <sup>R</sup> derivative of <i>P. fluorescens</i> 55                                                                                                  | (Murdoch <i>et al.</i> , 2011) |
| KT04                                  | Sm <sup>R</sup> Kan <sup>R</sup> derivative of <i>P. fluorescens</i> 55                                                                                 | (Murdoch <i>et al.</i> , 2011) |
| <b><i>Escherichia coli</i></b>        |                                                                                                                                                         |                                |
| CC118 $\lambda$ <i>pir</i>            | Donor strain for pKNG101-derived allelic exchange plasmids                                                                                              | (Herrero <i>et al.</i> , 1990) |
| HH26 pNJ5000                          | Mobilising strain for conjugal transfer                                                                                                                 | (Grinter, 1983)                |
| <b><u>Plasmids</u></b>                |                                                                                                                                                         |                                |
| <b>Mutagenesis</b>                    |                                                                                                                                                         |                                |
| pKNG101                               | Suicide vector for allelic exchange (Sm <sup>R</sup> , <i>sacBR</i> , <i>mobRK2</i> , <i>oriR6K</i> )                                                   | (Kaniga <i>et al.</i> , 1991)  |
| pSC1921                               | pKNG101-based allelic exchange plasmid for deletion of <i>tagV</i> (T3–T162)                                                                            | This study                     |
| pSC2031                               | pKNG101-based allelic exchange plasmid for deletion of <i>tssJ</i> (T4–S28)                                                                             | This study                     |
| pSC3430                               | pKNG101-based allelic exchange plasmid to introduce <i>tagV</i> $_{W100A}$ mutation                                                                     | This study                     |
| pSC2069                               | pKNG101-based marker exchange plasmid for deletion of <i>tagV</i> (T3–D151)                                                                             | This study                     |
| pSC1989                               | pKNG101-based marker exchange plasmid for addition of His <sub>6</sub> tag to C-terminus of <i>tagV</i>                                                 | (Mariano <i>et al.</i> , 2018) |
| <b>Protein production</b>             |                                                                                                                                                         |                                |
| pET15b-TEV                            | Protein overexpression vector for fusion with N-terminal His <sub>6</sub> tag under the control of T7 promoter. Derived from pET15b (Amp <sup>R</sup> ) | (Rao <i>et al.</i> , 2011)     |
| pSC102                                | Protein overexpression vector for fusion with N-terminal His <sub>6</sub> tag under the control of T5 promoter (Ap <sup>R</sup> , Kn <sup>R</sup> ).    | (English <i>et al.</i> , 2014) |
| pSC534                                | TssLpp (G218-K406) cloned in pSC102                                                                                                                     | This study                     |
| pSC055                                | TssMpp (L527-P1211) cloned in pET15b-TEV                                                                                                                | This study                     |

|             |                                       |                            |
|-------------|---------------------------------------|----------------------------|
| pSC1952     | mTagV (S19–Q166) cloned in pET15b-TEV | This study                 |
| pET15b-TEV_ | mTssJ (A30-D176) cloned in pET15b-TEV | (Rao <i>et al.</i> , 2011) |
| SMA2252T    |                                       |                            |

**Expression *in trans* in *S. marcescens***

|                 |                                                                                                                                   |                                |
|-----------------|-----------------------------------------------------------------------------------------------------------------------------------|--------------------------------|
| pSUPROM         | Vector for constitutive expression of cloned genes under the control of the <i>E. coli</i> <i>tat</i> promoter (Kn <sup>R</sup> ) | (Murdoch <i>et al.</i> , 2011) |
| pSC066          | Full length <i>tssJ</i> cloned in pSUPROM                                                                                         | (Murdoch <i>et al.</i> , 2011) |
| pSC1920         | Full length <i>tagV</i> cloned in pSUPROM                                                                                         | This study                     |
| pSC2017         | Full length <i>tagV</i> and <i>tssJ</i> cloned in pSUPROM                                                                         | This study                     |
| pSC2040         | Full length <i>tagV</i> with C-terminal His <sub>6</sub> tag and <i>tssJ</i> cloned in pSUPROM                                    | This study                     |
| pSC1920 (W100A) | Full length <i>tagV</i> containing W100A point mutation cloned in pSUPROM                                                         | This study                     |
| pSC1920 (Q116E) | Full length <i>tagV</i> containing Q116E point mutation cloned in pSUPROM                                                         | This study                     |
| pSC1920 (Q116P) | Full length <i>tagV</i> containing Q116P point mutation cloned in pSUPROM                                                         | This study                     |

---



**Table S3. Primers used in this study.**

| <b>Primer</b>                   | <b>Sequence (5'-3')</b>                           | <b>Description</b>                                                                                                            |
|---------------------------------|---------------------------------------------------|-------------------------------------------------------------------------------------------------------------------------------|
| <b>TagV mutant construction</b> |                                                   |                                                                                                                               |
| LM070                           | TGTGTCTAGATGCGCCAAACCGAGCACGTGCGCGC               | Forward primer to clone upstream region of <i>tagV</i> into pKNG101 for $\Delta tagV$ production in Db10                      |
| LM071                           | TATAAAGCTTTTTACAATGTCCTCTTTTTCTTGA                | Reverse primer to clone upstream region of <i>tagV</i> into pKNG101 for $\Delta tagV$ production in Db10                      |
| LM072                           | TATAAAGCTTTGGATCCTCCAGTAGTCAGCACGCC               | Forward primer to clone downstream region of <i>tagV</i> into pKNG101 for $\Delta tagV$ (T3–T162) production in Db10          |
| LM073                           | TATAGGGCCCTACTTCGCTTCAGCGCAGCGGTAGG               | Reverse primer to clone downstream region of <i>tagV</i> into pKNG101 for $\Delta tagV$ production in Db10                    |
| LM326                           | TATACTCGAGTTTACAATGTCCTCTTTTTCTTGA                | Reverse primer to clone upstream region of <i>tagV</i> into pKNG101 for $\Delta tagV$ production in $\Delta tssJ$             |
| LM327                           | TATACTCGAGTGGATCCTCCAGTAGTCAGCACGCC               | Forward primer to clone downstream region of <i>tagV</i> into pKNG101 for $\Delta tagV$ (T3-T162) production in $\Delta tssJ$ |
| LM383                           | TATAAAGCTTAGCAAGGCGTGTA AAAACGC                   | Forward primer to clone downstream region of <i>tagV</i> into pKNG101 for $\Delta tagV$ (T3-D151) production in Db10          |
| LM216                           | TATAAAGCTTCATCATCATCATCACTAGTCAGCA<br>CGCCTGCGGGC | Forward primer to incorporate a C-terminal His <sub>6</sub> tag into <i>tagV</i>                                              |
| MR009                           | ACAGGATCCAACGCGTTCAACATTCTGTTCGTC                 | Forward primer to clone upstream region of <i>tagV</i> into pKNG101 for <i>tagV</i> <sub>W100A</sub> production in Db10       |
| MR004                           | GGAGATCGCCAGCGCGTTGTT                             | Reverse primer to clone upstream region of <i>tagV</i> into pKNG101 for <i>tagV</i> <sub>W100A</sub> production in Db10       |
| MR005                           | AACAACGCGCTGGCGATCTCC                             | Forward primer to clone downstream region of <i>tagV</i> into pKNG101 for <i>tagV</i> <sub>W100A</sub> production in Db10     |
| MR006                           | ACATCTAGAAGAACTGATCGCTGTCCAGCAG                   | Reverse primer to clone downstream region of <i>tagV</i> into pKNG101 for <i>tagV</i> <sub>W100A</sub> production in Db10     |
| <b>TssJ mutant construction</b> |                                                   |                                                                                                                               |
| LM214                           | TGTATCTAGACTCGGCATGCGCATCGTGCC                    | Forward primer to clone upstream region of <i>tssJ</i> into pKNG101 for $\Delta tssJ$ (T4-S28) production in Db10 and SJC11   |

|        |                                  |                                                                                                                               |
|--------|----------------------------------|-------------------------------------------------------------------------------------------------------------------------------|
| SC2053 | TATAAAGCTTCGTATCATAGGAATCTCGTCG  | Reverse primer to clone upstream region of <i>tssJ</i> into pKNG101 for $\Delta tssJ$ (T4-S28) production in Db10 and SJC11   |
| LM310  | TATAAAGCTTTCCGCCAAAAGCGTGCCGTC   | Forward primer to clone downstream region of <i>tssJ</i> into pKNG101 for $\Delta tssJ$ (T4-S28) production in Db10 and SJC11 |
| SC2469 | TATAGGGCCCTATAGTTACTTCGCTTCAGCGC | Reverse primer to clone downstream region of <i>tssJ</i> into pKNG101 for $\Delta tssJ$ (T4-S28) production in Db10 and SJC11 |

### Protein expression

|        |                                                            |                                                                                             |
|--------|------------------------------------------------------------|---------------------------------------------------------------------------------------------|
| LM068  | TATATCTAGAGTGAAAACACGGATTACCCTGACGC                        | Forward primer to clone <i>tagV</i> into pSUPROM                                            |
| LM069  | TATAAAGCTTCTACTGGAGGATCCAGGTGGCTGAG                        | Reverse primer to clone <i>tagV</i> into pSUPROM                                            |
| LM293  | TATAAAGCTTTTCAGTCGACCTTTTTTACGG                            | Reverse primer to clone <i>tagV - tssJ</i> in pSUPROM                                       |
| LM305  | TATACTCGAGCTAGTGATGATGATGATGATGATG<br>CTGGAGGATCCAGGTGGCTG | Reverse primer to clone <i>tagV</i> with C-term His <sub>6</sub> tag (with TssJ) in pSUPROM |
| LM306  | TATACTCGAGTCAGCACGCCTGCGGGCGAC                             | Forward primer to clone <i>tssJ</i> (with <i>tagV</i> -His) in pSUPROM                      |
| SC2137 | TATACATATGTTGGGCAACGGCGACATGTTC                            | Forward primer to clone <i>tssMpp</i> into pET15b-TEV                                       |
| SC2120 | TATAGGATCCCTACGGGCACGAGAAGGC                               | Reverse primer to clone <i>tssMpp</i> into pET15b-TEV                                       |
| GE034  | TATAGGATCCGGCGACAACACCAGCCC                                | Forward primer to clone <i>tssLpp</i> into pSC102                                           |
| GE035  | TATAGTCGACTTACTTTCCGGTTCCTTGCGG                            | Reverse primer to clone <i>tssLpp</i> into pSC102                                           |

### Site-directed mutagenesis

|         |                              |                                                                  |
|---------|------------------------------|------------------------------------------------------------------|
| W100A_F | GGAAAACAACGCGCTGGCGATCTCCGCC | Site directed mutagenesis of pSC1920 to introduce W100A mutation |
| W100A_R | ACTTCGCCCAGCGCGTAG           | Site directed mutagenesis of pSC1920 to introduce W100A mutation |
| Q116E_F | GGGGTATATCGAGGCCAACGCCG      | Site directed mutagenesis of pSC1920 to introduce Q116E mutation |
| Q116E_R | ATCAGATCGCCCCGCGG            | Site directed mutagenesis of pSC1920 to introduce Q116E mutation |
| Q116P_F | GGGGTATATCCCGGCCAACGCCG      | Site directed mutagenesis of pSC1920 to introduce Q116P mutation |
| Q116P_R | ATCAGATCGCCCCGCGG            | Site directed mutagenesis of pSC1920 to introduce Q116P mutation |

---

## References for Supplementary Information

- Aschtgen, M.S., Thomas, M.S., and Cascales, E. (2010) Anchoring the type VI secretion system to the peptidoglycan: TssL, TagL, TagP... what else? *Virulence* **1**: 535-540.
- Baker, N.A., Sept, D., Joseph, S., Holst, M.J., and McCammon, J.A. (2001) Electrostatics of nanosystems: application to microtubules and the ribosome. *Proc Natl Acad Sci U S A* **98**: 10037-10041.
- Basler, M., Ho, B.T., and Mekalanos, J.J. (2013) Tit-for-tat: type VI secretion system counterattack during bacterial cell-cell interactions. *Cell* **152**: 884-894.
- Bernal, P., Furniss, R.C.D., Fecht, S., Leung, R.C.Y., Spiga, L., Mavridou, D.A.I., and Filloux, A. (2021) A novel stabilization mechanism for the type VI secretion system sheath. *Proc Natl Acad Sci U S A* **118**.
- Bondage, D.D., Lin, J.S., Ma, L.S., Kuo, C.H., and Lai, E.M. (2016) VgrG C terminus confers the type VI effector transport specificity and is required for binding with PAAR and adaptor-effector complex. *Proc Natl Acad Sci U S A* **113**: E3931-3940.
- Casabona, M.G., Silverman, J.M., Sall, K.M., Boyer, F., Coute, Y., Poirel, J., Grunwald, D., Mougous, J.D., Elsen, S., and Attree, I. (2013) An ABC transporter and an outer membrane lipoprotein participate in posttranslational activation of type VI secretion in *Pseudomonas aeruginosa*. *Environ Microbiol* **15**: 471-486.
- English, G., Byron, O., Cianfanelli, F.R., Prescott, A.R., and Coulthurst, S.J. (2014) Biochemical analysis of TssK, a core component of the bacterial Type VI secretion system, reveals distinct oligomeric states of TssK and identifies a TssK-TssFG subcomplex. *Biochem J* **461**: 291-304.
- Flyg, C., Kenne, K., and Boman, H.G. (1980) Insect pathogenic properties of *Serratia marcescens*: phage-resistant mutants with a decreased resistance to Cecropia immunity and a decreased virulence to *Drosophila*. *J Gen Microbiol* **120**: 173-181.
- Forster, A., Planamente, S., Manoli, E., Lossi, N.S., Freemont, P.S., and Filloux, A. (2014) Coevolution of the ATPase ClpV, the sheath proteins TssB and TssC, and the accessory protein TagJ/HsiE1 distinguishes type VI secretion classes. *J Biol Chem* **289**: 33032-33043.
- Fritsch, M.J., Trunk, K., Diniz, J.A., Guo, M., Trost, M., and Coulthurst, S.J. (2013) Proteomic identification of novel secreted antibacterial toxins of the *Serratia marcescens* type VI secretion system. *Mol Cell Proteomics* **12**: 2735-2749.
- Gallique, M., Decoin, V., Barbey, C., Rosay, T., Feuilloley, M.G., Orange, N., and Merieau, A. (2017) Contribution of the *Pseudomonas fluorescens* MFE01 Type VI Secretion System to Biofilm Formation. *PLoS One* **12**: e0170770.
- Grinter, N.J. (1983) A broad-host-range cloning vector transposable to various replicons. *Gene* **21**: 133-143.
- Hagemans, D., van Belzen, I.A., Moran Luengo, T., and Rudiger, S.G. (2015) A script to highlight hydrophobicity and charge on protein surfaces. *Front Mol Biosci* **2**: 56.
- Herrero, M., de Lorenzo, V., and Timmis, K.N. (1990) Transposon vectors containing non-antibiotic resistance selection markers for cloning and stable chromosomal insertion of foreign genes in gram-negative bacteria. *J Bacteriol* **172**: 6557-6567.
- Hsu, F., Schwarz, S., and Mougous, J.D. (2009) TagR promotes PpkA-catalysed type VI secretion activation in *Pseudomonas aeruginosa*. *Mol Microbiol* **72**: 1111-1125.
- Jiang, X., Beust, A., Sappa, P.K., Volker, U., Dinse, T., Herglotz, J., and Reinhold-Hurek, B. (2019) Two Functionally Deviating Type 6 Secretion Systems Occur in the Nitrogen-Fixing Endophyte *Azoarcus olearius* BH72. *Front Microbiol* **10**: 459.
- Kaniga, K., Delor, I., and Cornelis, G.R. (1991) A wide-host-range suicide vector for improving reverse genetics in gram-negative bacteria: inactivation of the *blaA* gene of *Yersinia enterocolitica*. *Gene* **109**: 137-141.
- Lennings, J., West, T.E., and Schwarz, S. (2018) The *Burkholderia* Type VI Secretion System 5: Composition, Regulation and Role in Virulence. *Front Microbiol* **9**: 3339.

- Li, L., Wang, Y.N., Jia, H.B., Wang, P., Dong, J.F., Deng, J., Lu, F.M., and Zou, Q.H. (2019) The type VI secretion system protein AsaA in *Acinetobacter baumannii* is a periplasmic protein physically interacting with TssM and required for T6SS assembly. *Sci Rep* **9**: 9438.
- Lin, J.S., Pissaridou, P., Wu, H.H., Tsai, M.D., Filloux, A., and Lai, E.M. (2018) TagF-mediated repression of bacterial type VI secretion systems involves a direct interaction with the cytoplasmic protein Fha. *J Biol Chem* **293**: 8829-8842.
- Lin, J.S., Wu, H.H., Hsu, P.H., Ma, L.S., Pang, Y.Y., Tsai, M.D., and Lai, E.M. (2014) Fha interaction with phosphothreonine of TssL activates type VI secretion in *Agrobacterium tumefaciens*. *PLoS Pathog* **10**: e1003991.
- Lin, L., Capozzoli, R., Ferrand, A., Plum, M., Vettiger, A., and Basler, M. (2022) Subcellular localization of Type VI secretion system assembly in response to cell-cell contact. *EMBO J*: e108595.
- Marchi, M., Boutin, M., Gazengel, K., Rispe, C., Gauthier, J.P., Guillerm-Erckelboudt, A.Y., Lebreton, L., Barret, M., Daval, S., and Sarniguet, A. (2013) Genomic analysis of the biocontrol strain *Pseudomonas fluorescens* Pf29Arp with evidence of T3SS and T6SS gene expression on plant roots. *Environ Microbiol Rep* **5**: 393-403.
- Mariano, G., Monlezun, L., and Coulthurst, S.J. (2018) Dual Role for DsbA in Attacking and Targeted Bacterial Cells during Type VI Secretion System-Mediated Competition. *Cell Rep* **22**: 774-785.
- Moriel, B., de Campos Prediger, K., de Souza, E.M., Pedrosa, F.O., Fadel-Picheth, C.M.T., and Cruz, L.M. (2021) In silico comparative analysis of *Aeromonas* Type VI Secretion System. *Braz J Microbiol* **52**: 229-243.
- Mougous, J.D., Gifford, C.A., Ramsdell, T.L., and Mekalanos, J.J. (2007) Threonine phosphorylation post-translationally regulates protein secretion in *Pseudomonas aeruginosa*. *Nat Cell Biol* **9**: 797-803.
- Murdoch, S.L., Trunk, K., English, G., Fritsch, M.J., Pourkarimi, E., and Coulthurst, S.J. (2011) The opportunistic pathogen *Serratia marcescens* utilizes type VI secretion to target bacterial competitors. *J Bacteriol* **193**: 6057-6069.
- Nguyen, V.S., Spinelli, S., Cascales, E., Roussel, A., Cambillau, C., and Leone, P. (2021) Anchoring the T6SS to the cell wall: Crystal structure of the peptidoglycan binding domain of the TagL accessory protein. *PLoS One* **16**: e0254232.
- Ostrowski, A., Cianfanelli, F.R., Porter, M., Mariano, G., Peltier, J., Wong, J.J., Swedlow, J.R., Trost, M., and Coulthurst, S.J. (2018) Killing with proficiency: Integrated post-translational regulation of an offensive Type VI secretion system. *PLoS Pathog* **14**: e1007230.
- Rao, V.A., Shepherd, S.M., English, G., Coulthurst, S.J., and Hunter, W.N. (2011) The structure of *Serratia marcescens* Lip, a membrane-bound component of the type VI secretion system. *Acta Crystallogr D Biol Crystallogr* **67**: 1065-1072.
- Ringel, P.D., Hu, D., and Basler, M. (2017) The Role of Type VI Secretion System Effectors in Target Cell Lysis and Subsequent Horizontal Gene Transfer. *Cell Rep* **21**: 3927-3940.
- Santin, Y.G., Camy, C.E., Zoued, A., Doan, T., Aschtgen, M.S., and Cascales, E. (2019) Role and Recruitment of the TagL Peptidoglycan-Binding Protein during Type VI Secretion System Biogenesis. *J Bacteriol* **201**.
- Santin, Y.G., Doan, T., Lebrun, R., Espinosa, L., Journet, L., and Cascales, E. (2018) In vivo TssA proximity labelling during type VI secretion biogenesis reveals TagA as a protein that stops and holds the sheath. *Nat Microbiol* **3**: 1304-1313.
- Schneider, J.P., Nazarov, S., Adaixo, R., Liuzzo, M., Ringel, P.D., Stahlberg, H., and Basler, M. (2019) Diverse roles of TssA-like proteins in the assembly of bacterial type VI secretion systems. *EMBO J* **38**: e100825.
- Shalom, G., Shaw, J.G., and Thomas, M.S. (2007) In vivo expression technology identifies a type VI secretion system locus in *Burkholderia pseudomallei* that is induced upon invasion of macrophages. *Microbiology* **153**: 2689-2699.

- Silverman, J.M., Austin, L.S., Hsu, F., Hicks, K.G., Hood, R.D., and Mougous, J.D. (2011) Separate inputs modulate phosphorylation-dependent and -independent type VI secretion activation. *Mol Microbiol* **82**: 1277-1290.
- Speare, L., Woo, M., Dunn, A.K., and Septer, A.N. (2022) A Putative Lipoprotein Mediates Cell-Cell Contact for Type VI Secretion System-Dependent Killing of Specific Competitors. *mBio* **13**: e0308521.
- Spiewak, H.L., Shastri, S., Zhang, L., Schwager, S., Eberl, L., Vergunst, A.C., and Thomas, M.S. (2019) *Burkholderia cenocepacia* utilizes a type VI secretion system for bacterial competition. *MicrobiologyOpen*: e774.
- Volkamer, A., Kuhn, D., Grombacher, T., Rippmann, F., and Rarey, M. (2012) Combining global and local measures for structure-based druggability predictions. *J Chem Inf Model* **52**: 360-372.
- Weber, B.S., Hennon, S.W., Wright, M.S., Scott, N.E., de Berardinis, V., Foster, L.J., Ayala, J.A., Adams, M.D., and Feldman, M.F. (2016) Genetic Dissection of the Type VI Secretion System in *Acinetobacter* and Identification of a Novel Peptidoglycan Hydrolase, TagX, Required for Its Biogenesis. *MBio* **7**.
- Zhang, J., Arif, M., Shen, H., Hu, J., Sun, D., Pu, X., Yang, Q., and Lin, B. (2020) Genomic divergence between *Dickeya zeae* strain EC2 isolated from rice and previously identified strains, suggests a different rice foot rot strain. *PLOS ONE* **15**: e0240908.
- Zhang, Z., Liu, Y., Zhang, P., Wang, J., Li, D., and Li, Y.Z. (2021) PAAR Proteins Are Versatile Clips That Enrich the Antimicrobial Weapon Arsenals of Prokaryotes. *mSystems* **6**: e0095321.
